# Supplementary material for: A highly selective fluorescent sensor for the detection of Al3+ and CN− in aqueous solution: biological applications and DFT calculations
Source: Royal Society of Chemistry journal article supplement (doi:10.1039/c6nj01544a), 2016-01-01
Supplement: c6nj01544a1.pdf [file c6nj01544a1.pdf]

## Supporting Information

### **A highly selective fluorescence sensor for Al<sup>3+</sup> and CN<sup>-</sup> in aqueous solution: biological applications and DFT calculations**

Tae Geun Jo,<sup>a</sup> Jae Jun Lee,<sup>a</sup> Eunju Nam,<sup>b</sup> Kwon Hee Bok,<sup>a</sup> Mi Hee Lim,<sup>b\*</sup> Cheal Kim\*

*<sup>a</sup>Department of Fine Chemistry and Department of Interdisciplinary Bio IT Materials,  
Seoul National University of Science and Technology, Seoul 139-743, Republic of Korea.  
Fax: +82-2-973-9149; Tel: +82-2-970-6693; E-mail: [chealkim@seoultech.ac.kr](mailto:chealkim@seoultech.ac.kr)*

*<sup>b</sup>Department of Chemistry, Ulsan National Institute of Science and Technology  
(UNIST), Ulsan 44919, Republic of Korea. Fax: +82-52-217-5409; Tel: +82-52-217-  
5422; E-mail: [mhlim@unist.ac.kr](mailto:mhlim@unist.ac.kr)*

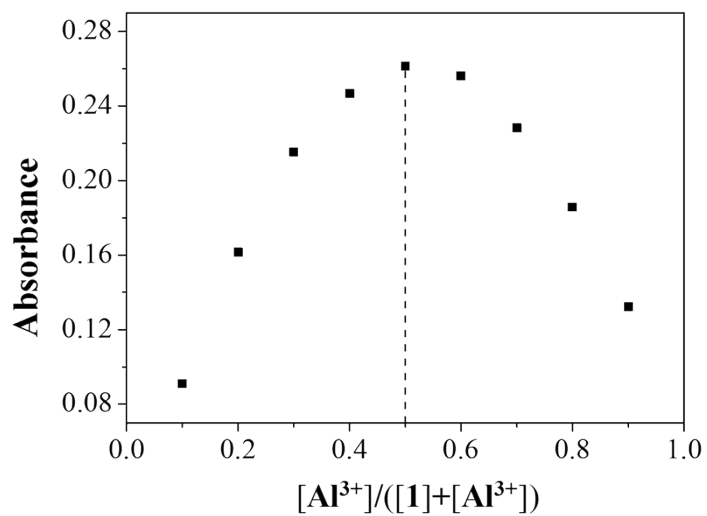

**Fig. S1** Job plot for the binding of **1** with  $Al^{3+}$ . Absorbance at 310 nm was plotted as a function of the molar ratio  $[Al^{3+}]/([1] + [Al^{3+}])$ . The total concentration of aluminium ions with receptor **1** was  $1.0 \times 10^{-4}$  M.

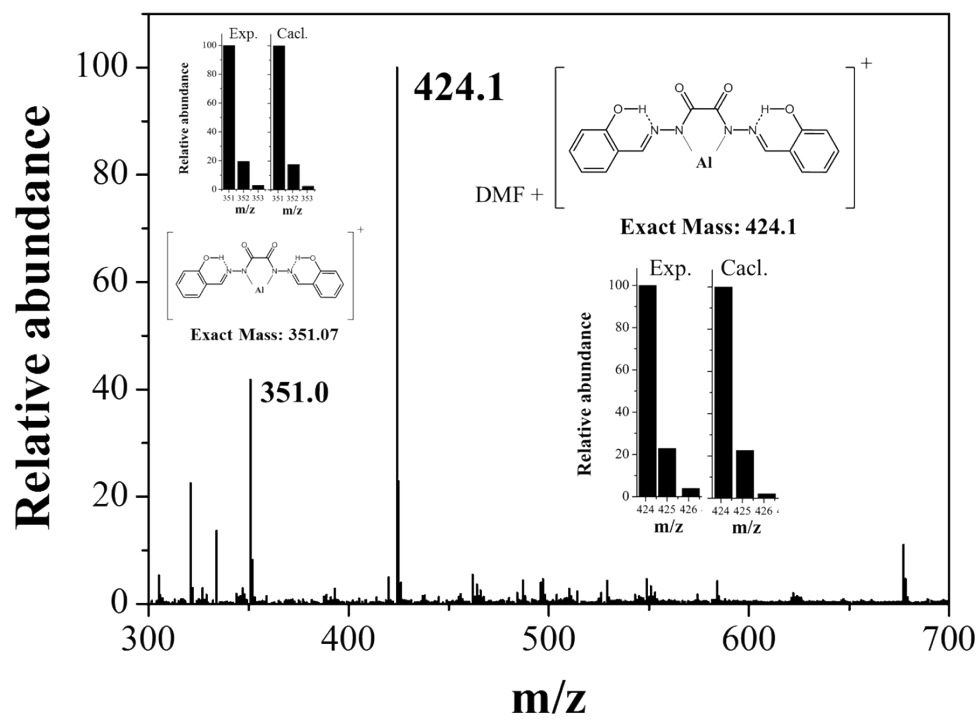

**Fig. S2** Positive-ion electrospray ionization mass spectrum of **1** (10  $\mu$ M) upon addition of  $\text{Al}(\text{NO}_3)_3$  (1 equiv).

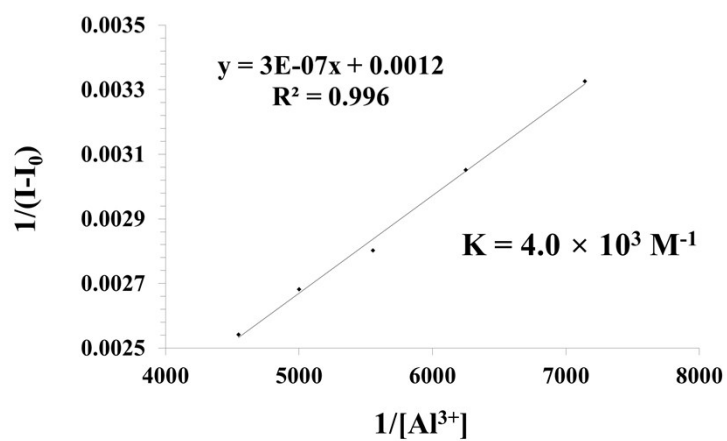

**Fig. S3** Benesi-Hildebrand plot (fluorescence intensity at 491 nm) of **1** (5  $\mu$ M), assuming 1:1 stoichiometry for association between **1** and  $Al^{3+}$ .

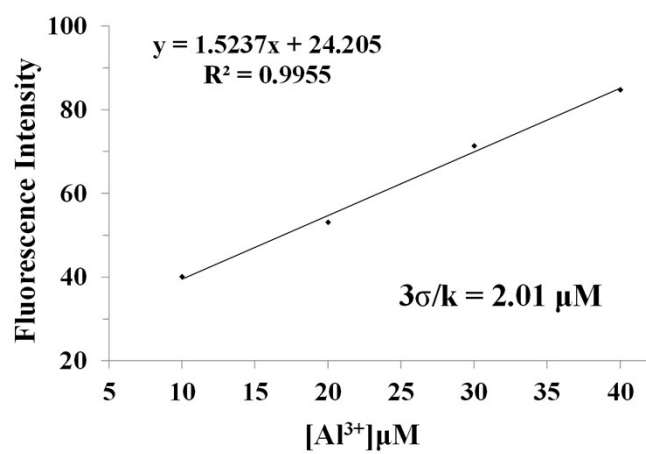

**Fig. S4** Determination of the detection limit based on change in the ratio (fluorescence intensity at 491 nm) of **1** (5  $\mu\text{M}$ ) with  $\text{Al}^{3+}$ .



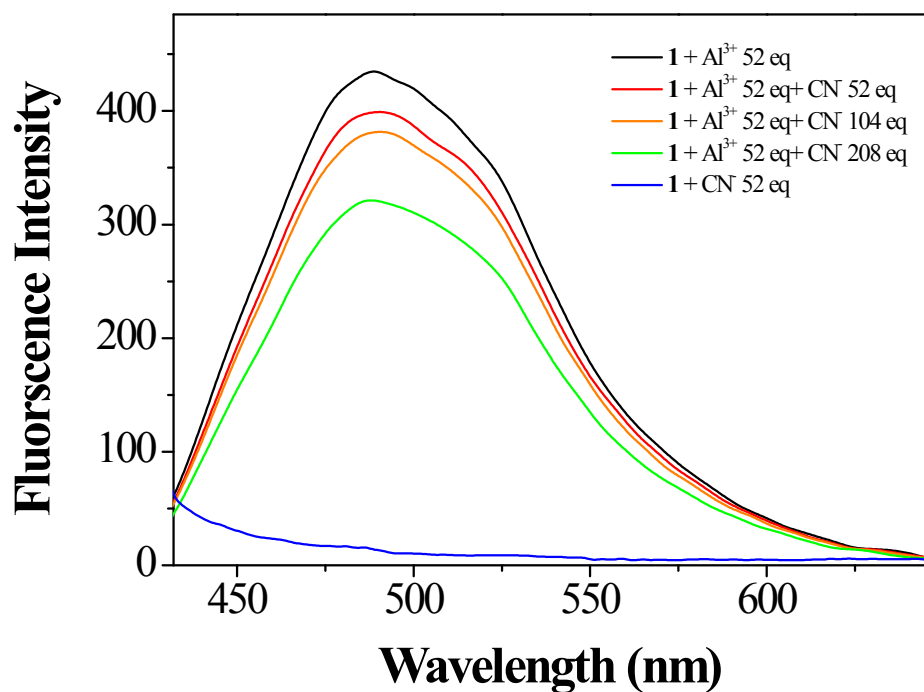

**Fig. S6** Fluorescence spectral changes of **1** (5 μM) in the presence of Al<sup>3+</sup>, CN<sup>-</sup>, both Al<sup>3+</sup> and CN<sup>-</sup>, respectively, in bis-tris buffer solution.

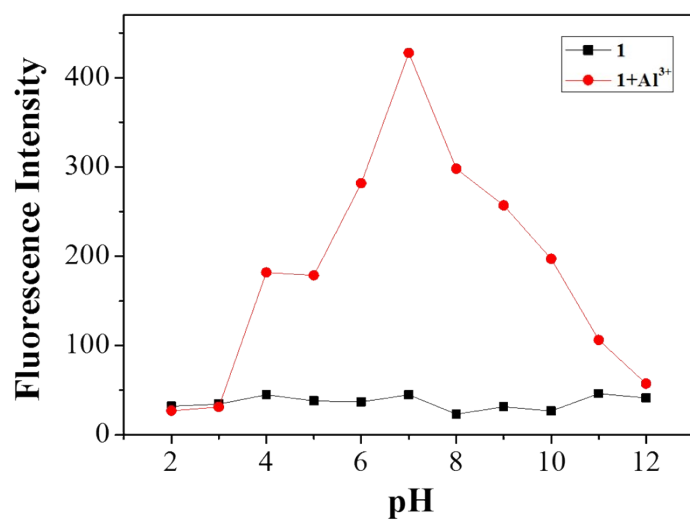

**Fig. S7** Fluorescence intensity (at 491 nm) of **1**-Al<sup>3+</sup> complex at different pH values (2-12) in bis-tris buffer solution.



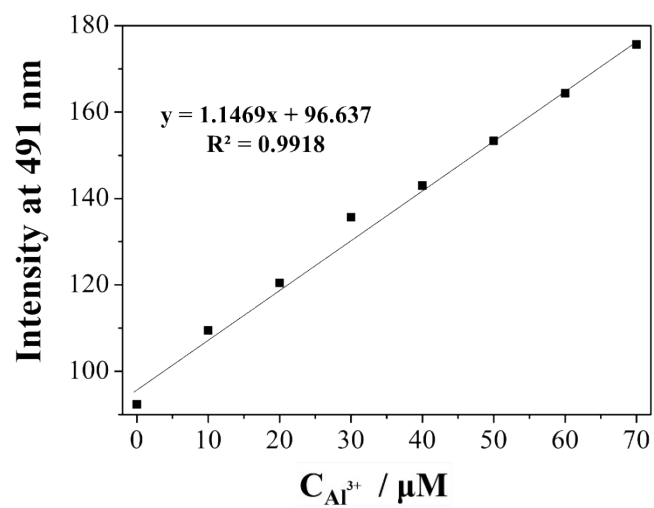

**Fig. S8** Absorption (at 491 nm) of **1** as a function of  $Al^{3+}$  concentration.  $[1] = 15 \mu mol/L$  and  $[Al^{3+}] = 0-70.0 \mu mol/L$ .

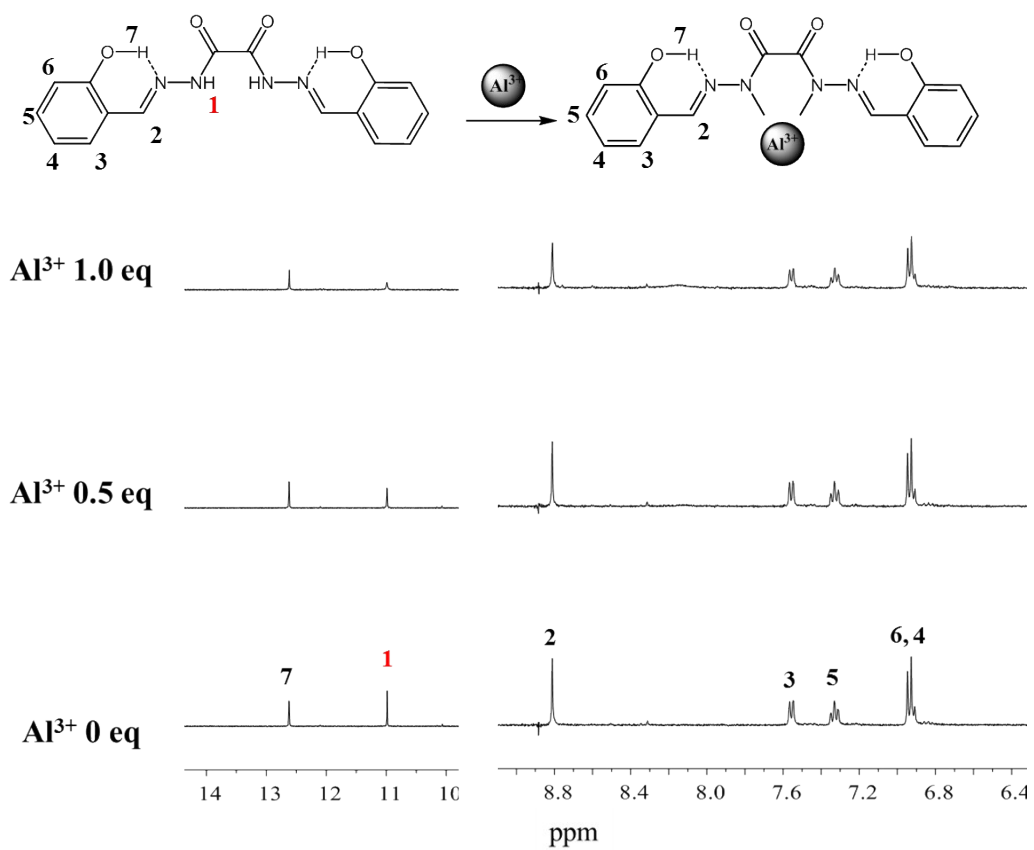

Fig. S9  $^1\text{H}$  NMR titration of receptor **1** with  $\text{Al}^{3+}$ .

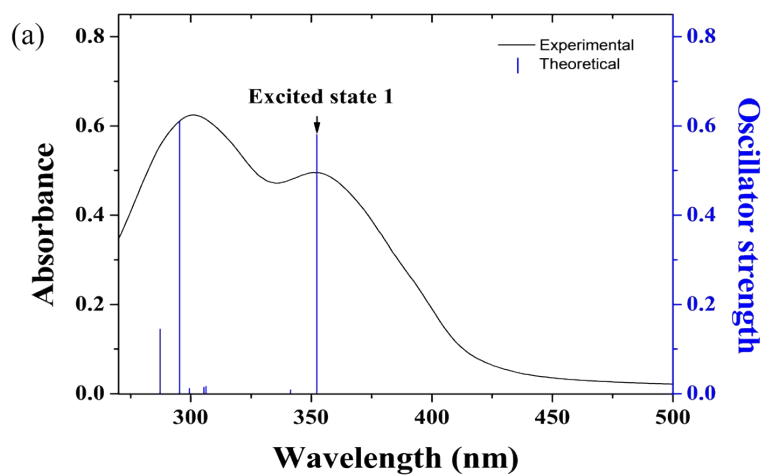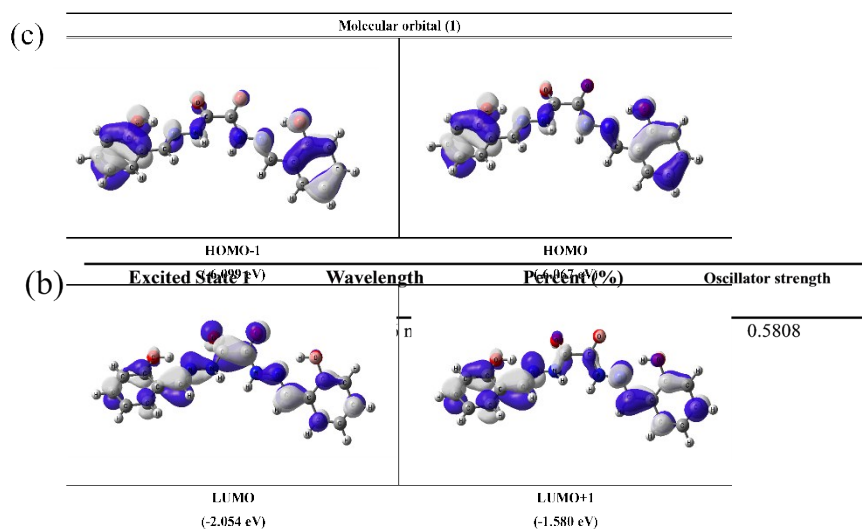

**Fig. S10** (a) The theoretical excitation energies (TD-DFT method) and the experimental UV-vis spectrum of **1**. (b) The major electronic transition energies and molecular orbital

contributions for **1** (H = HOMO and L = LUMO). (c) Isosurface (0.030 electron bohr<sup>-3</sup>) of molecular orbitals participating in the major singlet excited states of **1**.

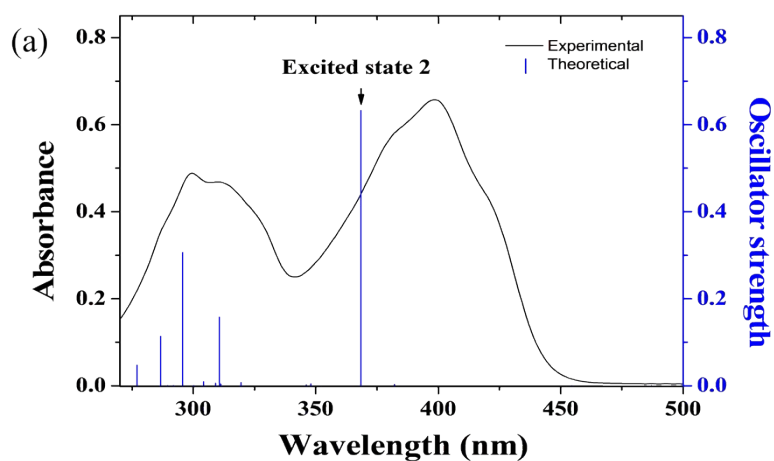

**Fig. S11** (a) The theoretical excitation energies (TD-DFT method) and the experimental

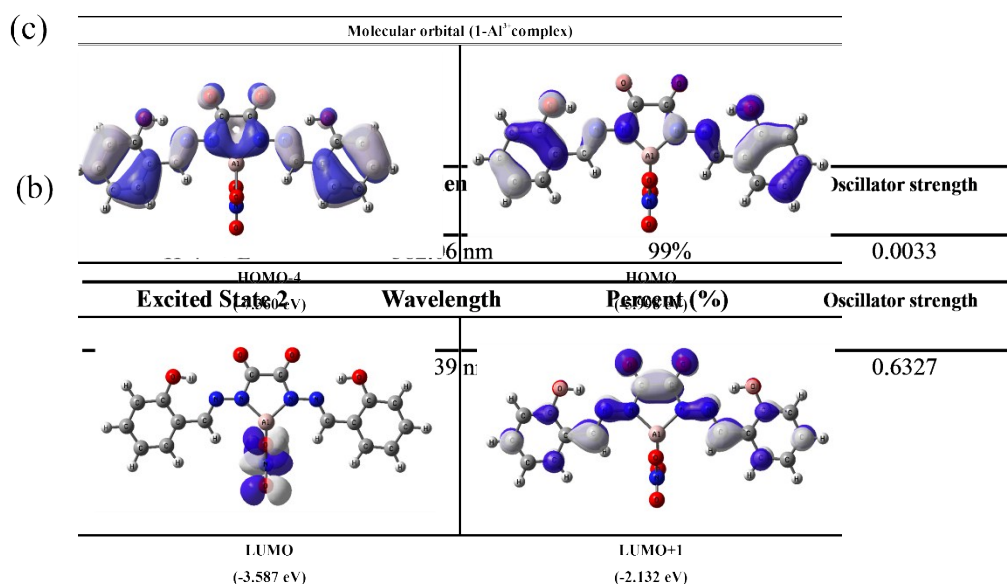

UV-vis spectrum of **1**-Al<sup>3+</sup>. (b) The major electronic transition energies and molecular orbital contributions for **1**-Al<sup>3+</sup> (H = HOMO and L = LUMO). (b) Isosurface (0.030 electron bohr<sup>-3</sup>) of molecular orbitals participating in the major singlet excited states of **1**-Al<sup>3+</sup>.

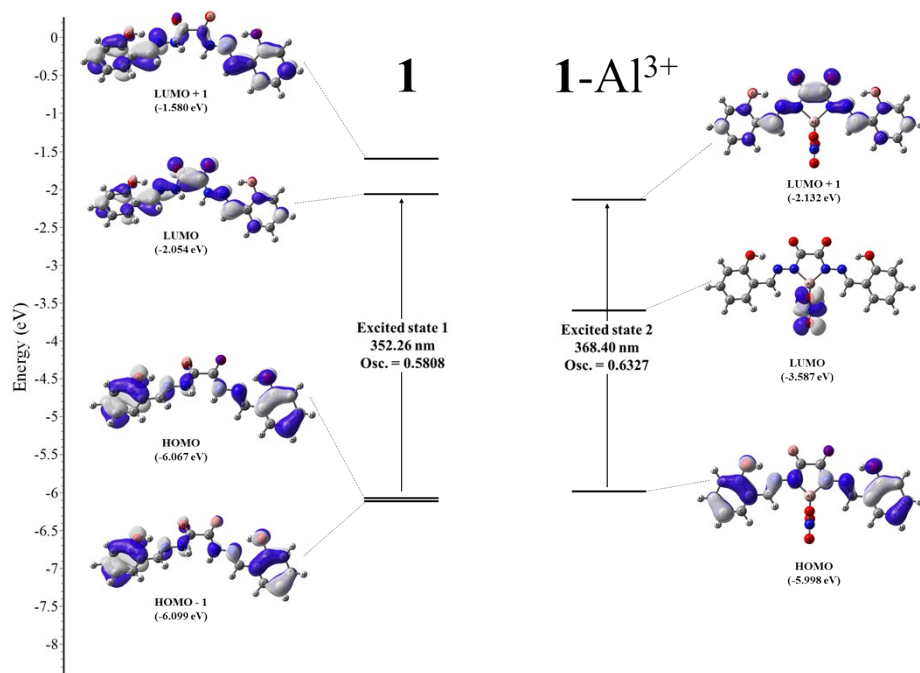

**Fig. S12** Frontier molecular orbitals and their energies involved in the UV-vis absorption of **1** and **1-Al<sup>3+</sup>** complex.

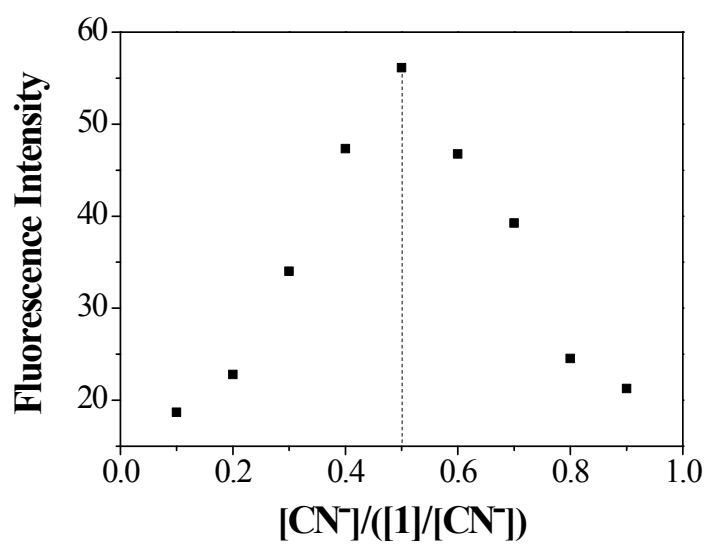

**Fig. S13** Job plot for receptor **1** with  $\text{CN}^-$ . Fluorescence intensity at 522 nm was plotted as a function of the molar ratio  $[\text{CN}^-]/([\text{1}] + [\text{CN}^-])$ . The total concentration of  $\text{CN}^-$  with receptor **1** was  $1.0 \times 10^{-4}$  M

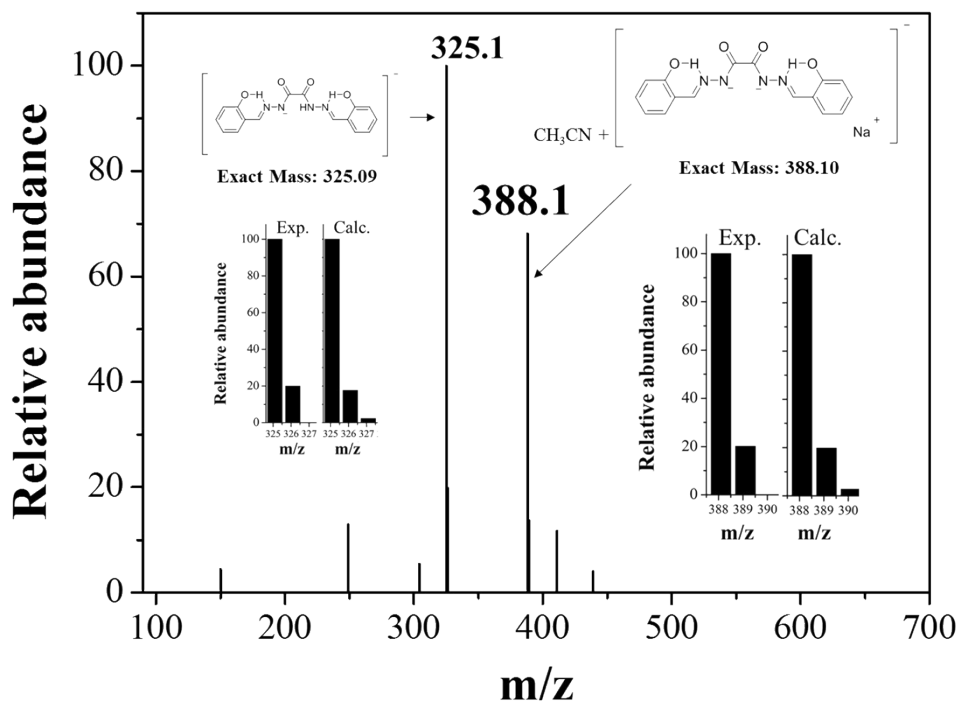

**Fig. S14** Negative-ion electrospray ionization mass spectrum of **1** (10  $\mu\text{M}$ ) upon addition of TEA(CN) (5 equiv).



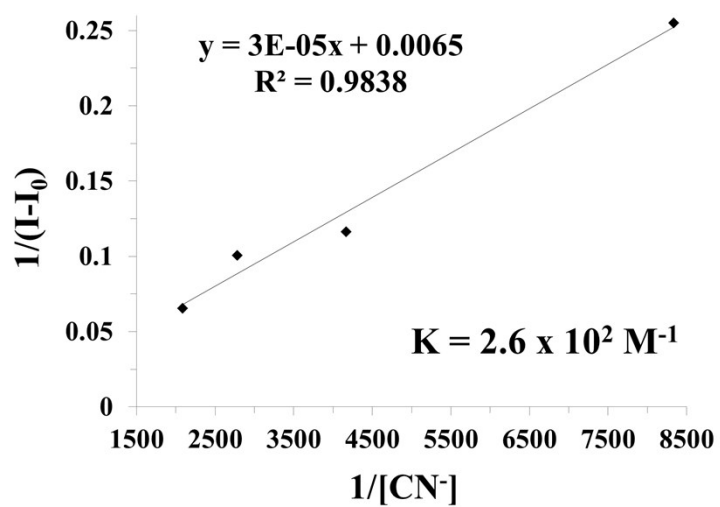

**Fig. S15** Benesi-Hildebrand plot (fluorescence intensity at 522 nm) of **1** (30  $\mu\text{M}$ ), assuming 1:1 stoichiometry for association between **1** and  $\text{CN}^-$ .

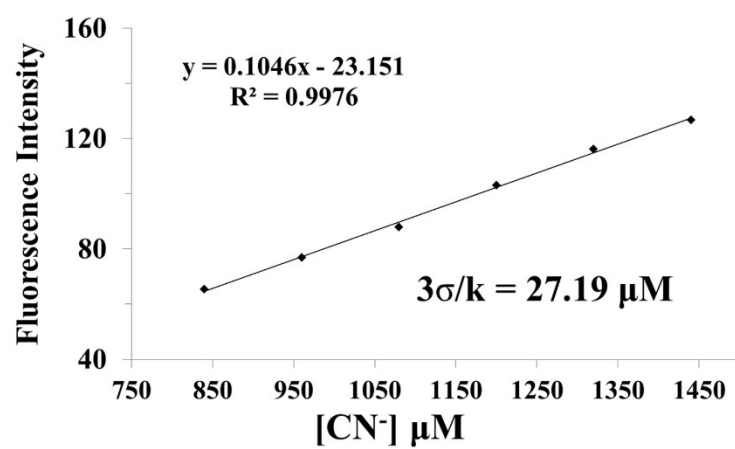

**Fig. S16** Determination of the detection limit based on change in the ratio (fluorescence intensity at 522 nm) of **1** (30 μM) with CN<sup>-</sup>.

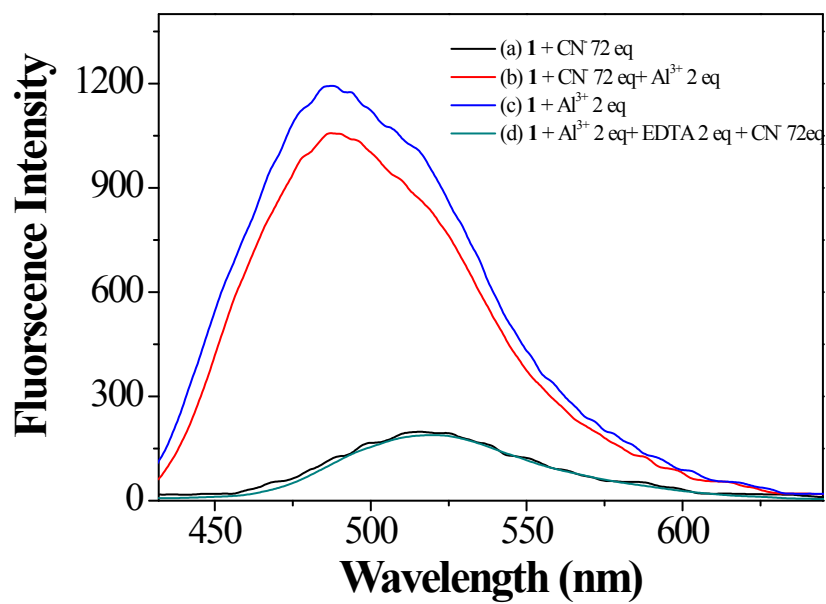

**Fig. S17** Fluorescence spectral changes of **1** (30 μM) in buffer-DMSO (1:1, v/v) solution: (a) **1** + CN<sup>-</sup> (72 equiv), (b) **1** + CN<sup>-</sup> (72 equiv) + Al<sup>3+</sup> (2 equiv), (c) **1** + Al<sup>3+</sup> (2 equiv), and (d) **1** + Al<sup>3+</sup> (2 equiv) + EDTA (2 equiv) + CN<sup>-</sup> (72 equiv).

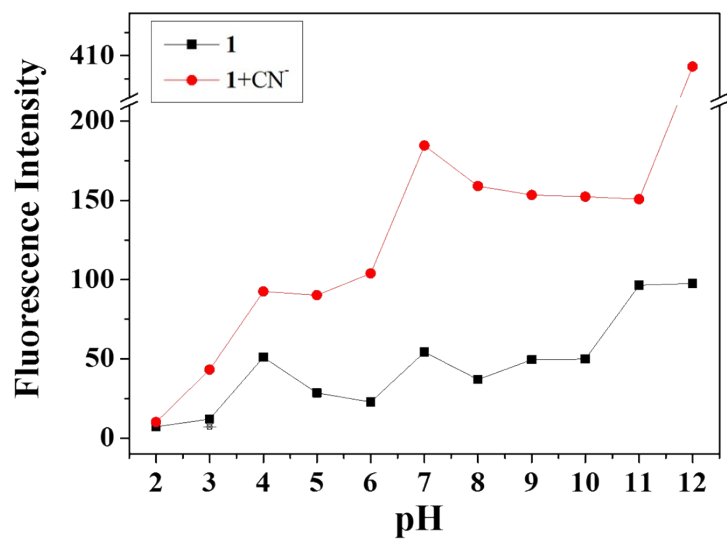

**Fig. S18** Fluorescence intensity at 522 nm of **1** and **1-CN** species at different pH values (2-12) in bis-tris buffer solution.

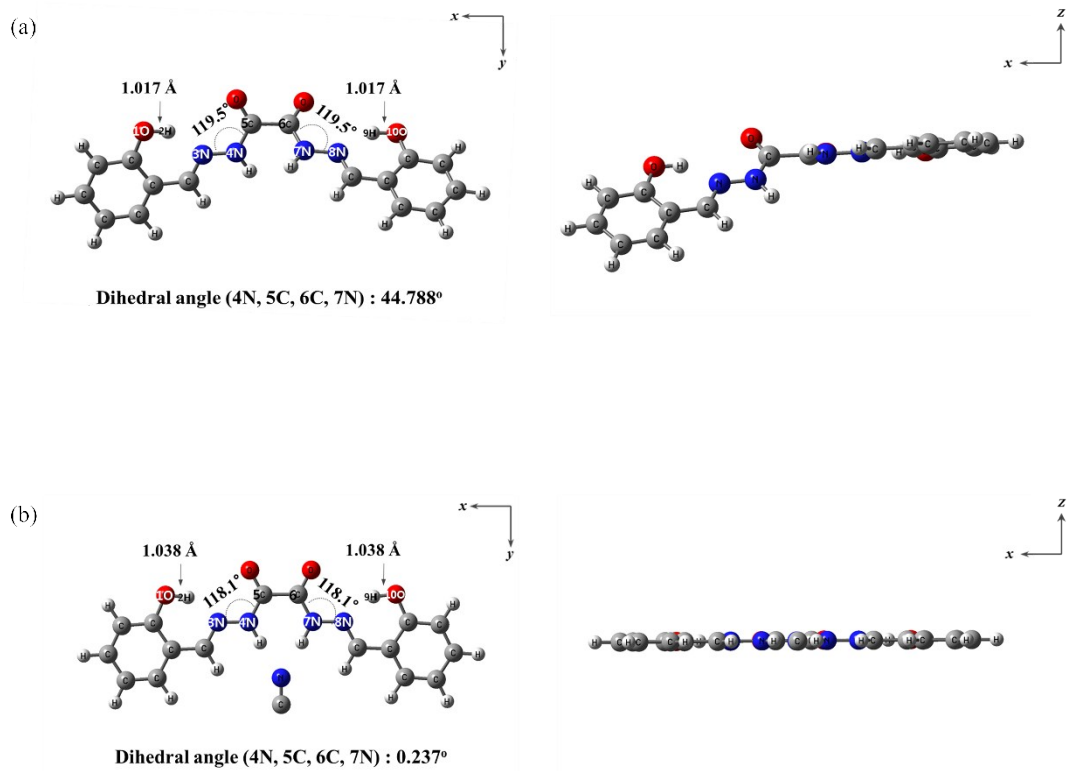

**Fig. S19** Energy-minimized structures of (a) **1** and (b) **1-CN<sup>-</sup>** from B3LYP level.

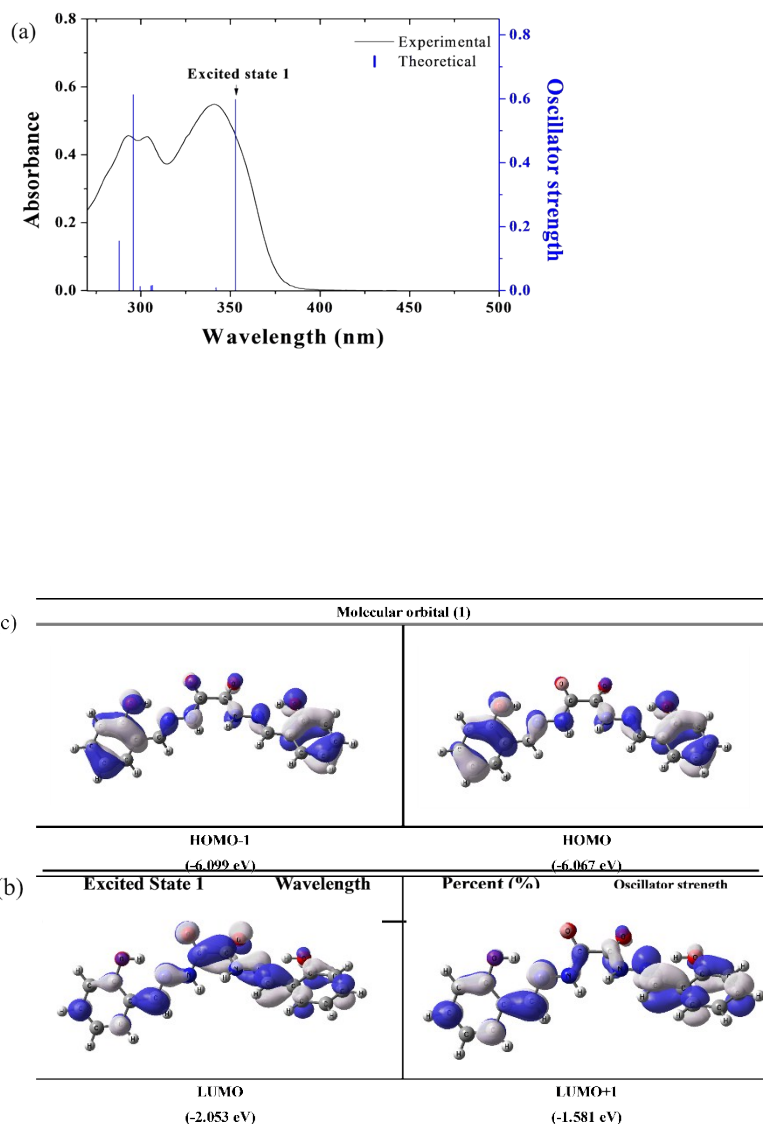

**Fig. S20** (a) The theoretical excitation energies (TD-DFT method) and the experimental UV-vis spectrum of **1**. (b) The major electronic transition energies and molecular orbital contributions for **1** (H = HOMO and L = LUMO). (c) Isosurface (0.030 electron bohr<sup>-3</sup>)

of molecular orbitals participating in the major singlet excited states of **1**.

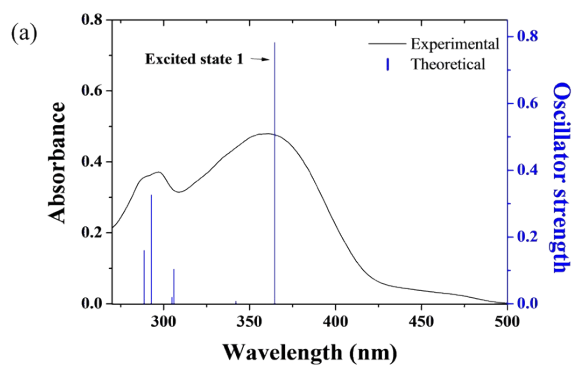

(b)

| Excited State 1 | Wavelength | Percent (%) | Oscillator strength |
|-----------------|------------|-------------|---------------------|
| H → L           | 369.69 nm  | 98%         | 0.7824              |

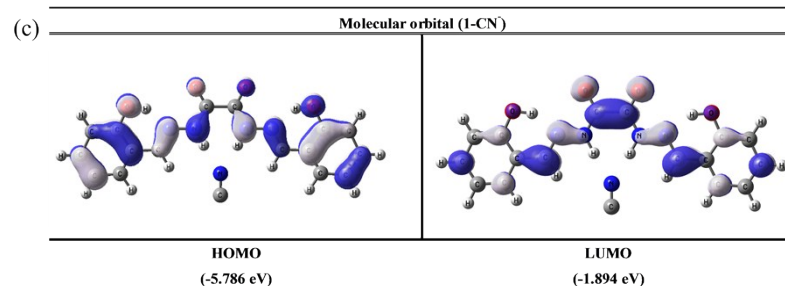

**Fig. S21** (a) The theoretical excitation energies (TD-DFT method) and the experimental UV-vis spectrum of **1-CN<sup>-</sup>**. (b) The major electronic transition energies and molecular orbital contributions for **1-CN<sup>-</sup>** (H = HOMO and L = LUMO). (c) Isosurface (0.030 electron bohr<sup>-3</sup>) of molecular orbitals participating in the major singlet excited states of **1-CN<sup>-</sup>**.

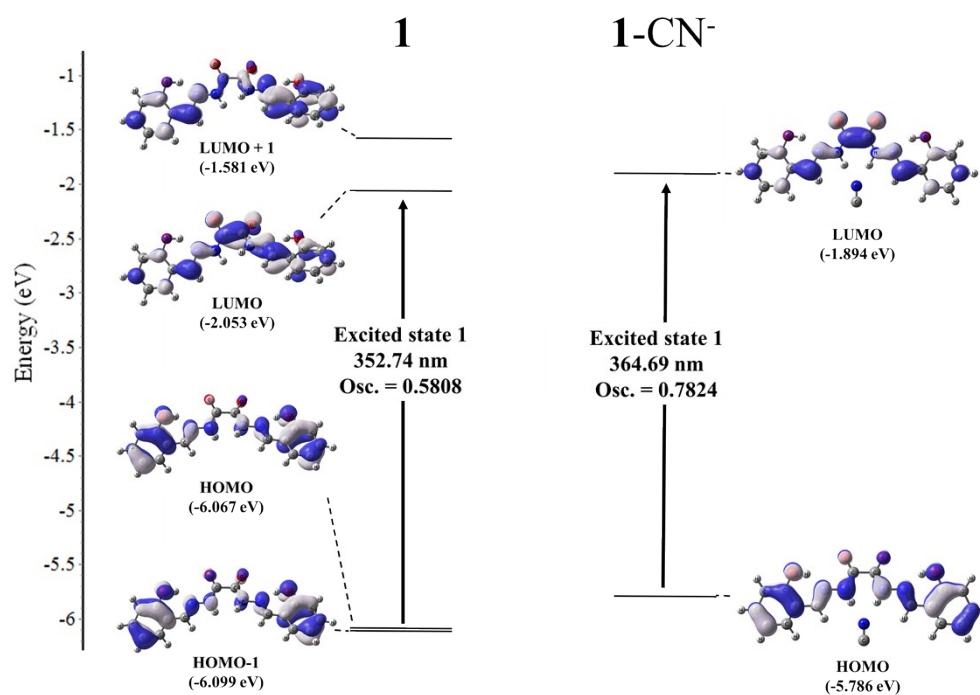

**Fig. S22** Frontier molecular orbitals and their energies involved in the UV-vis absorption of **1** and **1-CN<sup>-</sup>**
